# Supplementary material
Source: PubMed Central journal article supplement (PMC8078727)
Supplement: NIHMS1580729-supplement-1.pdf [file NIHMS1580729-supplement-1.pdf]

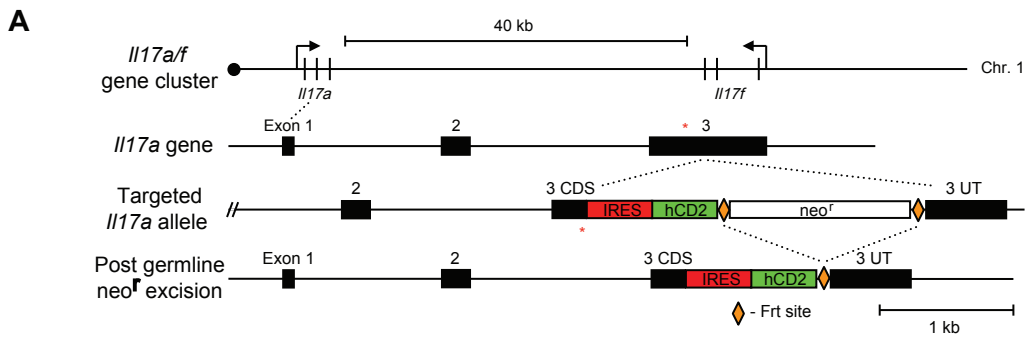

**B** IL-17a.hCD2 Reporter

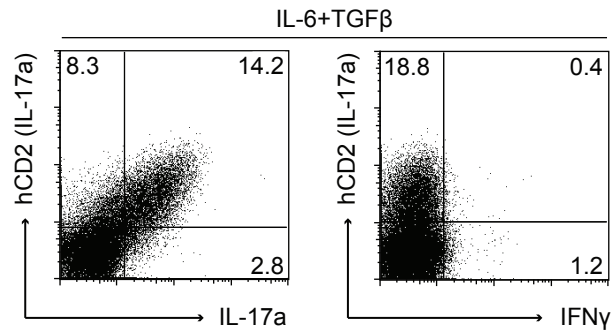

**C** IFN $\gamma$ .Thy1.1-IL-17a.hCD2-Foxp3.GFP Triple Reporter

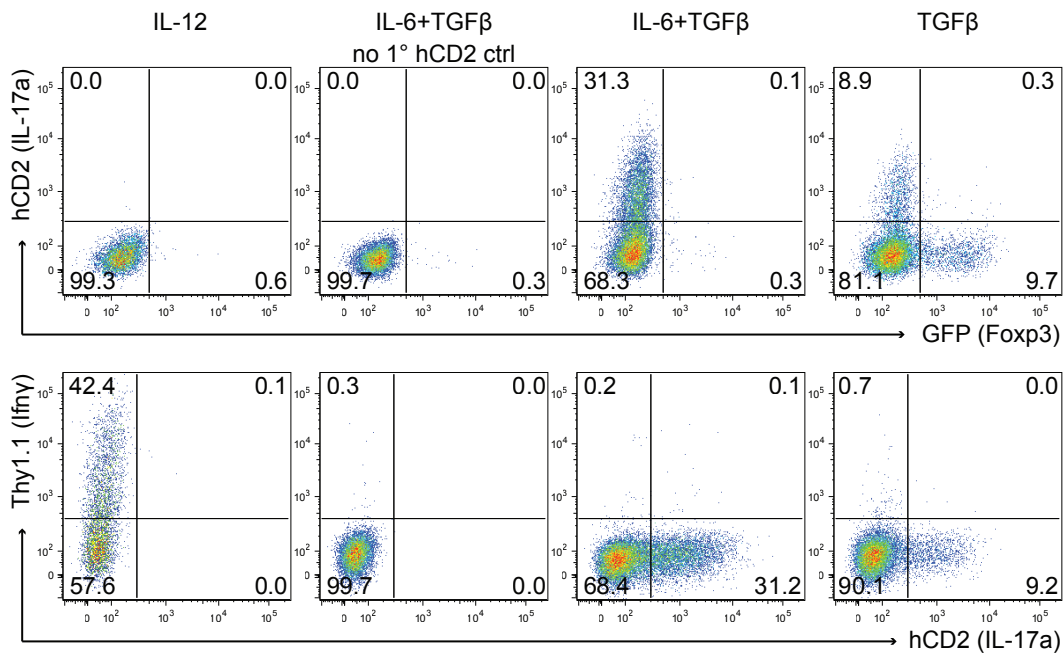

**D** *Igf1r*

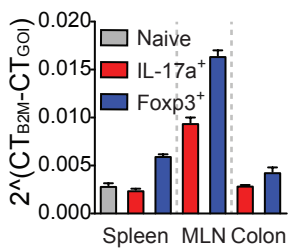

**E** *Igf1r*

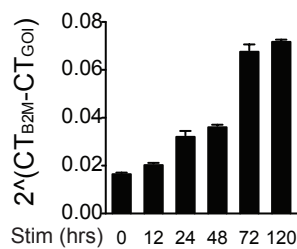

**F** Naive

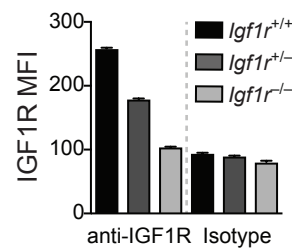

**G** Stimulated

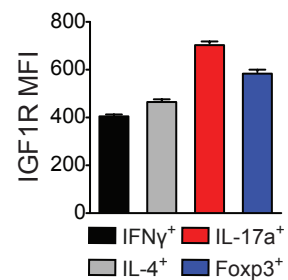

Figure S1

### Figure S1. IL-17a reporter design and validation.

Related to Main Figure 1.

(A) Expression cassette and targeting strategy used to generate IL-17a.hCD2 reporter mice. The Frt-flanked neomycin resistance cassette was removed following germ line transmission by crossing founders to EIIa.Flp transgenic C57BL/6 mates. (B) Sorted naïve IL-17a.hCD2 CD4<sup>+</sup> T cells were stimulated in Th17 conditions for 5 days. Flow cytometric analysis of IL-17a, hCD2, and IFN $\gamma$  shown. (C) Sorted naïve IFN $\gamma$ .Thy1.1-IL-17a.hCD2-Foxp3.GFP CD4<sup>+</sup> T cells were stimulated under Th1, Th17 and Treg conditions for 5 days and analyzed by flow cytometry. (D) IL-17a.hCD2-Foxp3.GFP mice were orally gavaged with 1-2x10<sup>9</sup> CFU *Citrobacter rodentium* strain DBS100 (ATCC 51459). 8 days later, RNA was isolated from splenic naïve CD4<sup>+</sup> T cells, and IL-17a.hCD2<sup>+</sup> and Foxp3.GFP<sup>+</sup> CD4<sup>+</sup> T cells harvested from the spleen, mesenteric lymph nodes (MLN) and colon. qPCR for *Igf1r* is shown. (E) Sorted naïve WT CD4<sup>+</sup> T cells were cultured in Th17 conditions for the indicated times. mRNA was analyzed by qPCR for expression of *Igf1r*. (F) Flow cytometric analysis of IGF1R on splenic naïve CD4<sup>+</sup> T cells isolated from *Cd4.Cre Igf1r<sup>+/+</sup>, fl<sup>+/+</sup>*, and *fl/fl* mice. (G) Sorted WT naïve CD4<sup>+</sup> T cells were stimulated in Th1, Th2, Th17 and Treg conditions for 5 days. Surface IGF1R on cytokine-positive cells was analyzed by flow cytometry.

**A**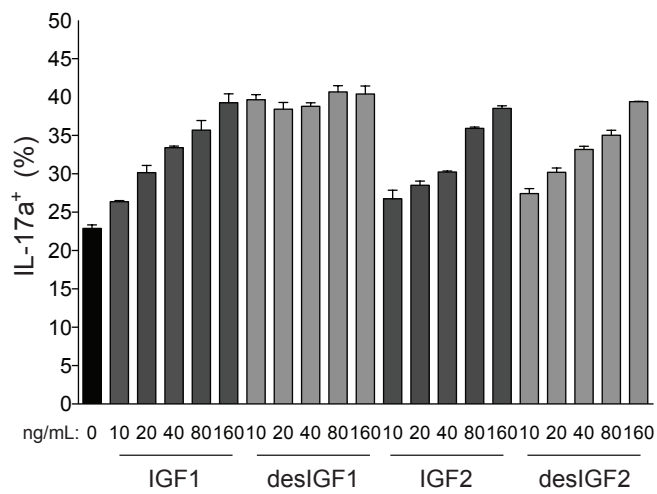**B**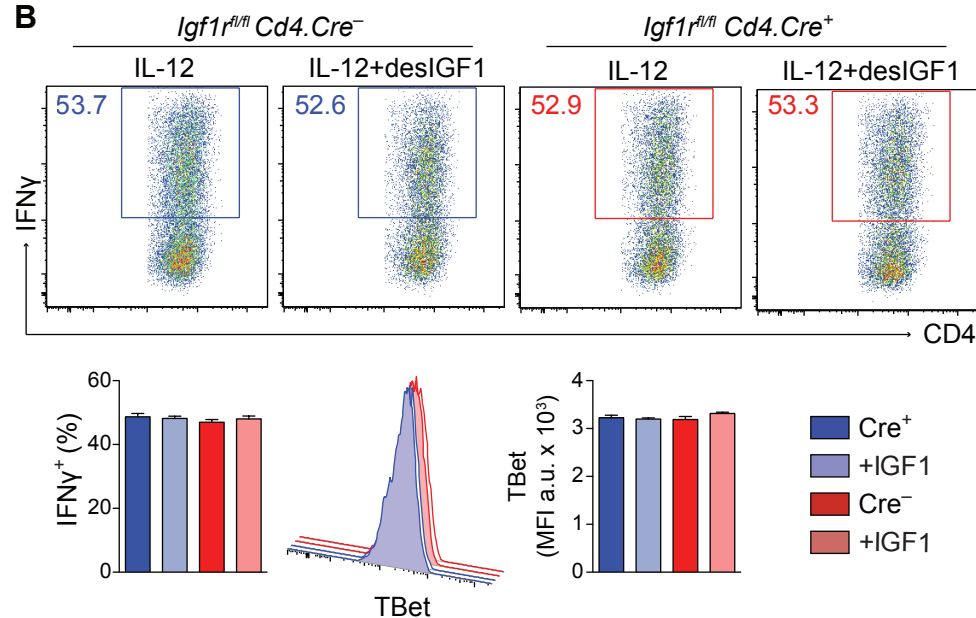**C**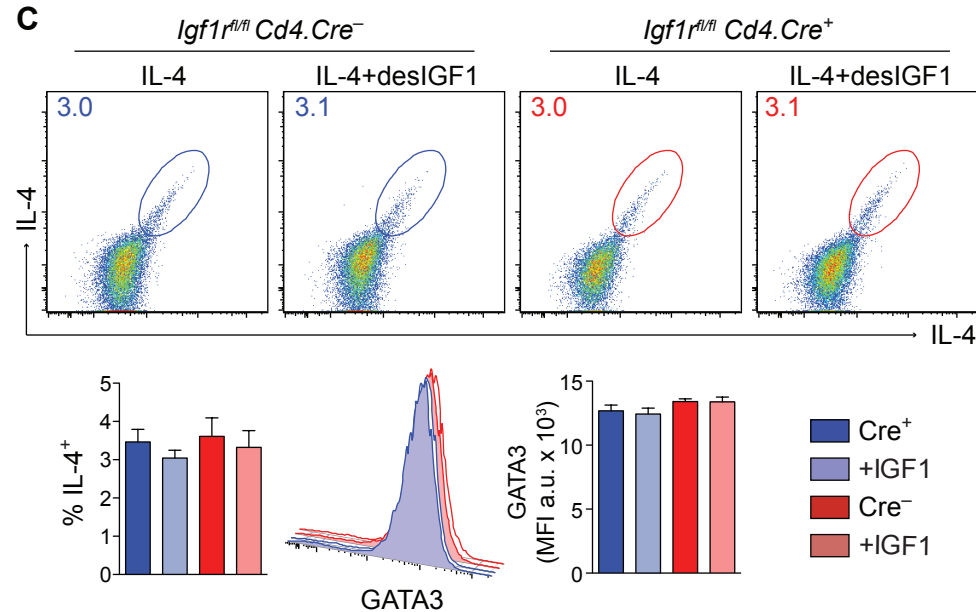**D**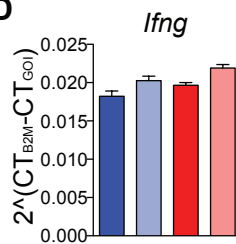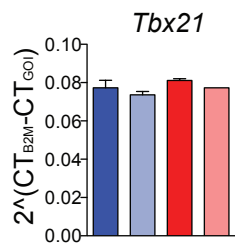**E**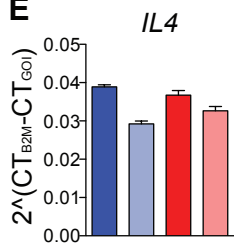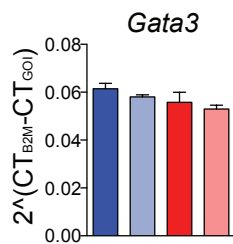

Figure S2

**Figure S2. Signaling through IGF1R does not influence Th1 and Th2 differentiation in-vitro.**

Related to Main Figure 1.

(A) Sorted naive CD4<sup>+</sup> T cells were activated in Th17 (A) or Treg (not shown) conditions for 5 days in the indicated concentrations of IGF1, desIGF1, IGF2 and desIGF2 then assessed for expression of IL17a and Foxp3 by flow cytometry. (B) Sorted naive CD4<sup>+</sup> T cells were stimulated in-vitro for 5 days in Th17 (upper panels) or Treg (lower panels) cell conditions with or without desIGF1 and qPCR performed for expression of *Il17a*, *Rorc* and *Foxp3* mRNA isolated from sorted total cells. 1 of 3 similar experiments shown. (C-E) Sorted naive *Igf1r<sup>fl/fl</sup>* Cre<sup>-</sup> and Cre<sup>+</sup> CD4<sup>+</sup> T cells were cultured in-vitro for 5 days in Th1 (C,E) or Th2 (D,F) conditions. Data are representative of 3-5 independent experiments. (C) Flow cytometric analysis of IFN $\gamma$  and Tbet expression in Th1 conditions. (D) Flow cytometric analysis of IL-4 and Gata3 expression in Th2 conditions. (E) RNA isolated from total live CD4<sup>+</sup> T cells cultured in Th1 conditions was analyzed by qPCR for expression of *Ifng* and *Tbx21*. (F) RNA isolated from total live CD4<sup>+</sup> T cells cultured in Th2 conditions was analyzed by qPCR for expression of *Il4* and *Gata3*.

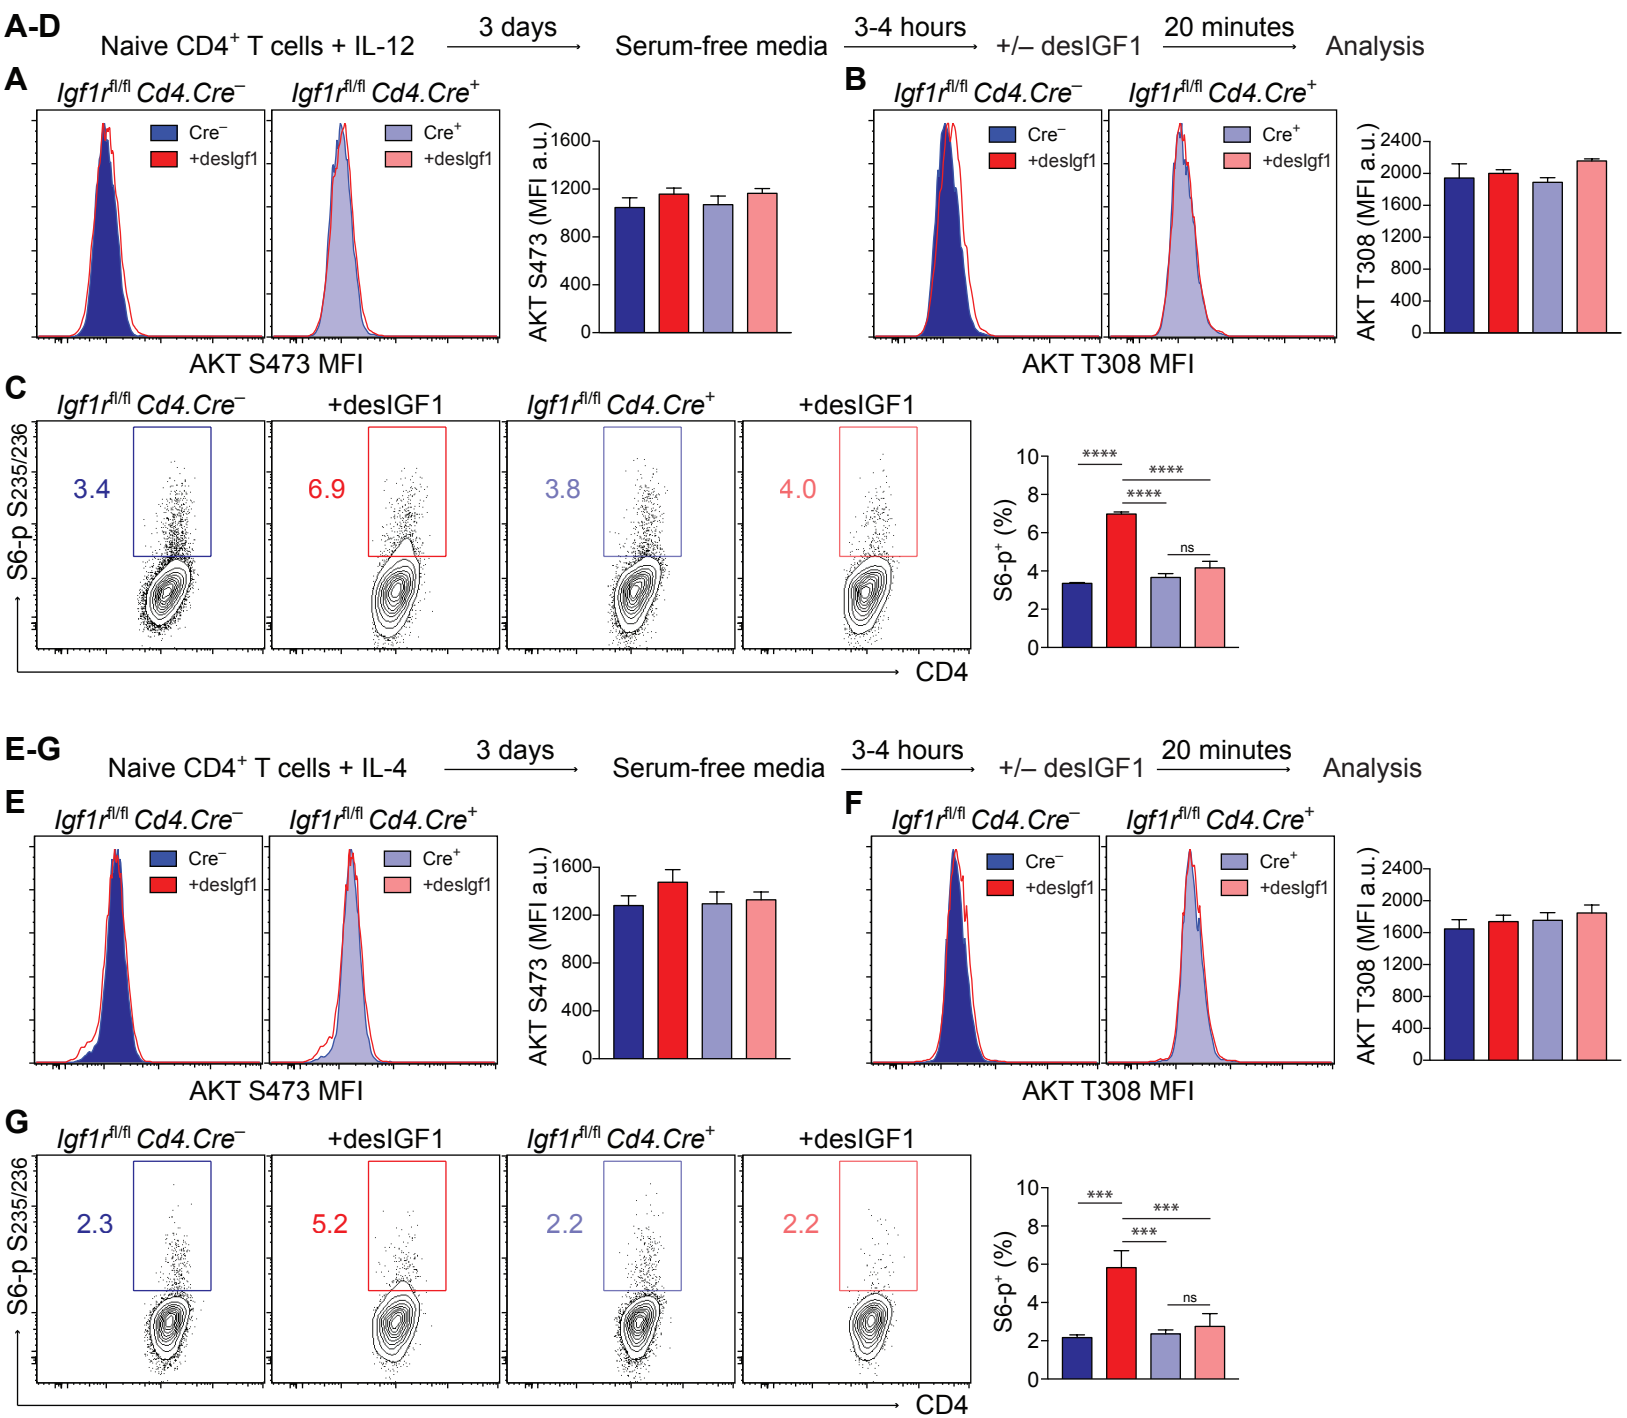

Figure S3

**Figure S3. IGF1R signaling does not activate AKT/mTOR in Th1 and Th2 CD4<sup>+</sup> T cells.**

Related to Main Figure 2.

(**A-C**) Sorted naive CD4<sup>+</sup> T cells were activated for 3 days in-vitro in Th1 conditions, washed and serum-starved for 4-6 hours, then re-stimulated with desIGF1 for 15 minutes. Flow cytometric analysis of phosphorylation of AKT on serine 473 (**A**) and threonine 308 (**B**) and phosphorylation of S6 ribosomal protein (**C**) is shown. Data for A-C are representative of 3 separate experiments. (**D-F**) Sorted naive CD4<sup>+</sup> T cells were activated for 3 days in-vitro in Treg conditions, washed and serum-starved for 4-6 hours, then re-stimulated with desIGF1 for 15 minutes. Flow cytometric analysis of phosphorylation of AKT on serine 473 (**D**) and threonine 308 (**E**) and phosphorylation of S6 ribosomal protein (**F**) is shown. Data for D-F are representative of 3 separate experiments. Data in A-F were analyzed using two-way ANOVAs with Tukey's post-hoc multiple comparisons test.

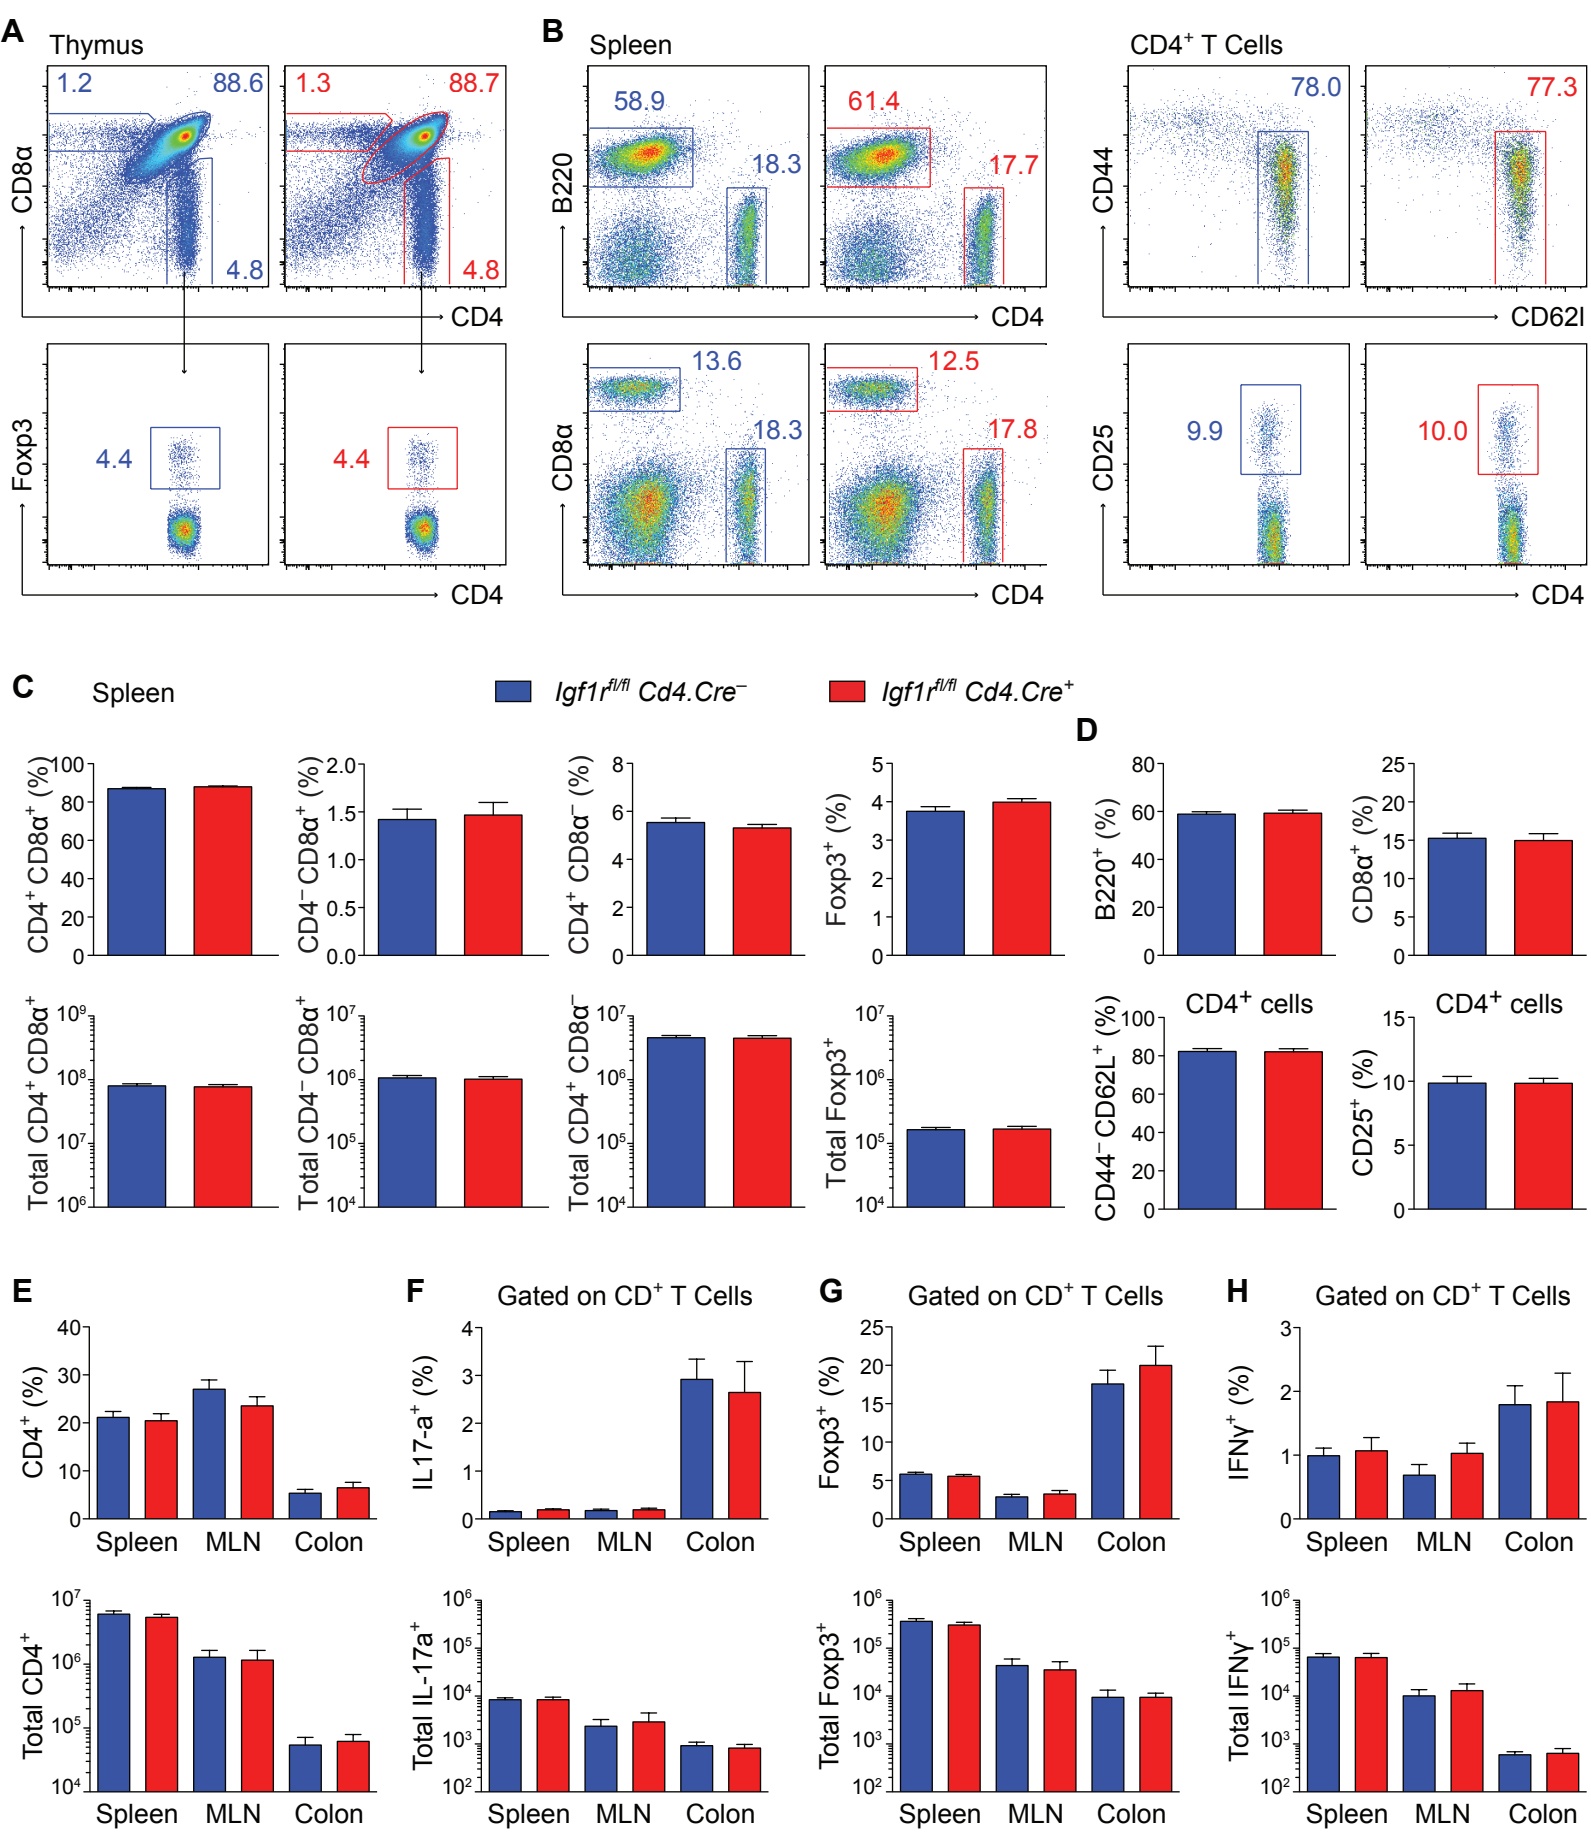

Figure S4

**Figure S4. Deletion of IGF1R in cells expressing CD4 does not alter endogenous lymphocyte populations.**

Related to Main Figure 3.

Gender-matched litter-mate controls were used in all studies of endogenous lymphocyte populations. In all panels, data from IGF1R floxed CD4-Cre<sup>-</sup> mice are depicted in blue, while data from CD4-Cre<sup>+</sup> mice are depicted in red. **(A)** Flow cytometric analysis of thymocyte expression of CD8a, CD4 and Foxp3. Data are representative of 2 separate experiments (WT n=15, KO n=12). **(B)** Flow cytometric analysis of CD4, CD8a, B220, CD44, CD25 and CD62l expression on splenic lymphocytes. Data are representative of 2 separate experiments (WT n=12, KO n=12). **(C)** Quantification of data depicted in A. **(D)** Quantification of data depicted in B. **(E-H)** Percent and total number of live **(E)**, IL-17a<sup>+</sup> **(F)**, Foxp3<sup>+</sup> **(G)**, and IFN $\gamma$ <sup>+</sup> **(H)** +T cells recovered from the spleen, MLN and colon. Data shown are pooled from 2 separate experiments (WT n=16, KO n=13).



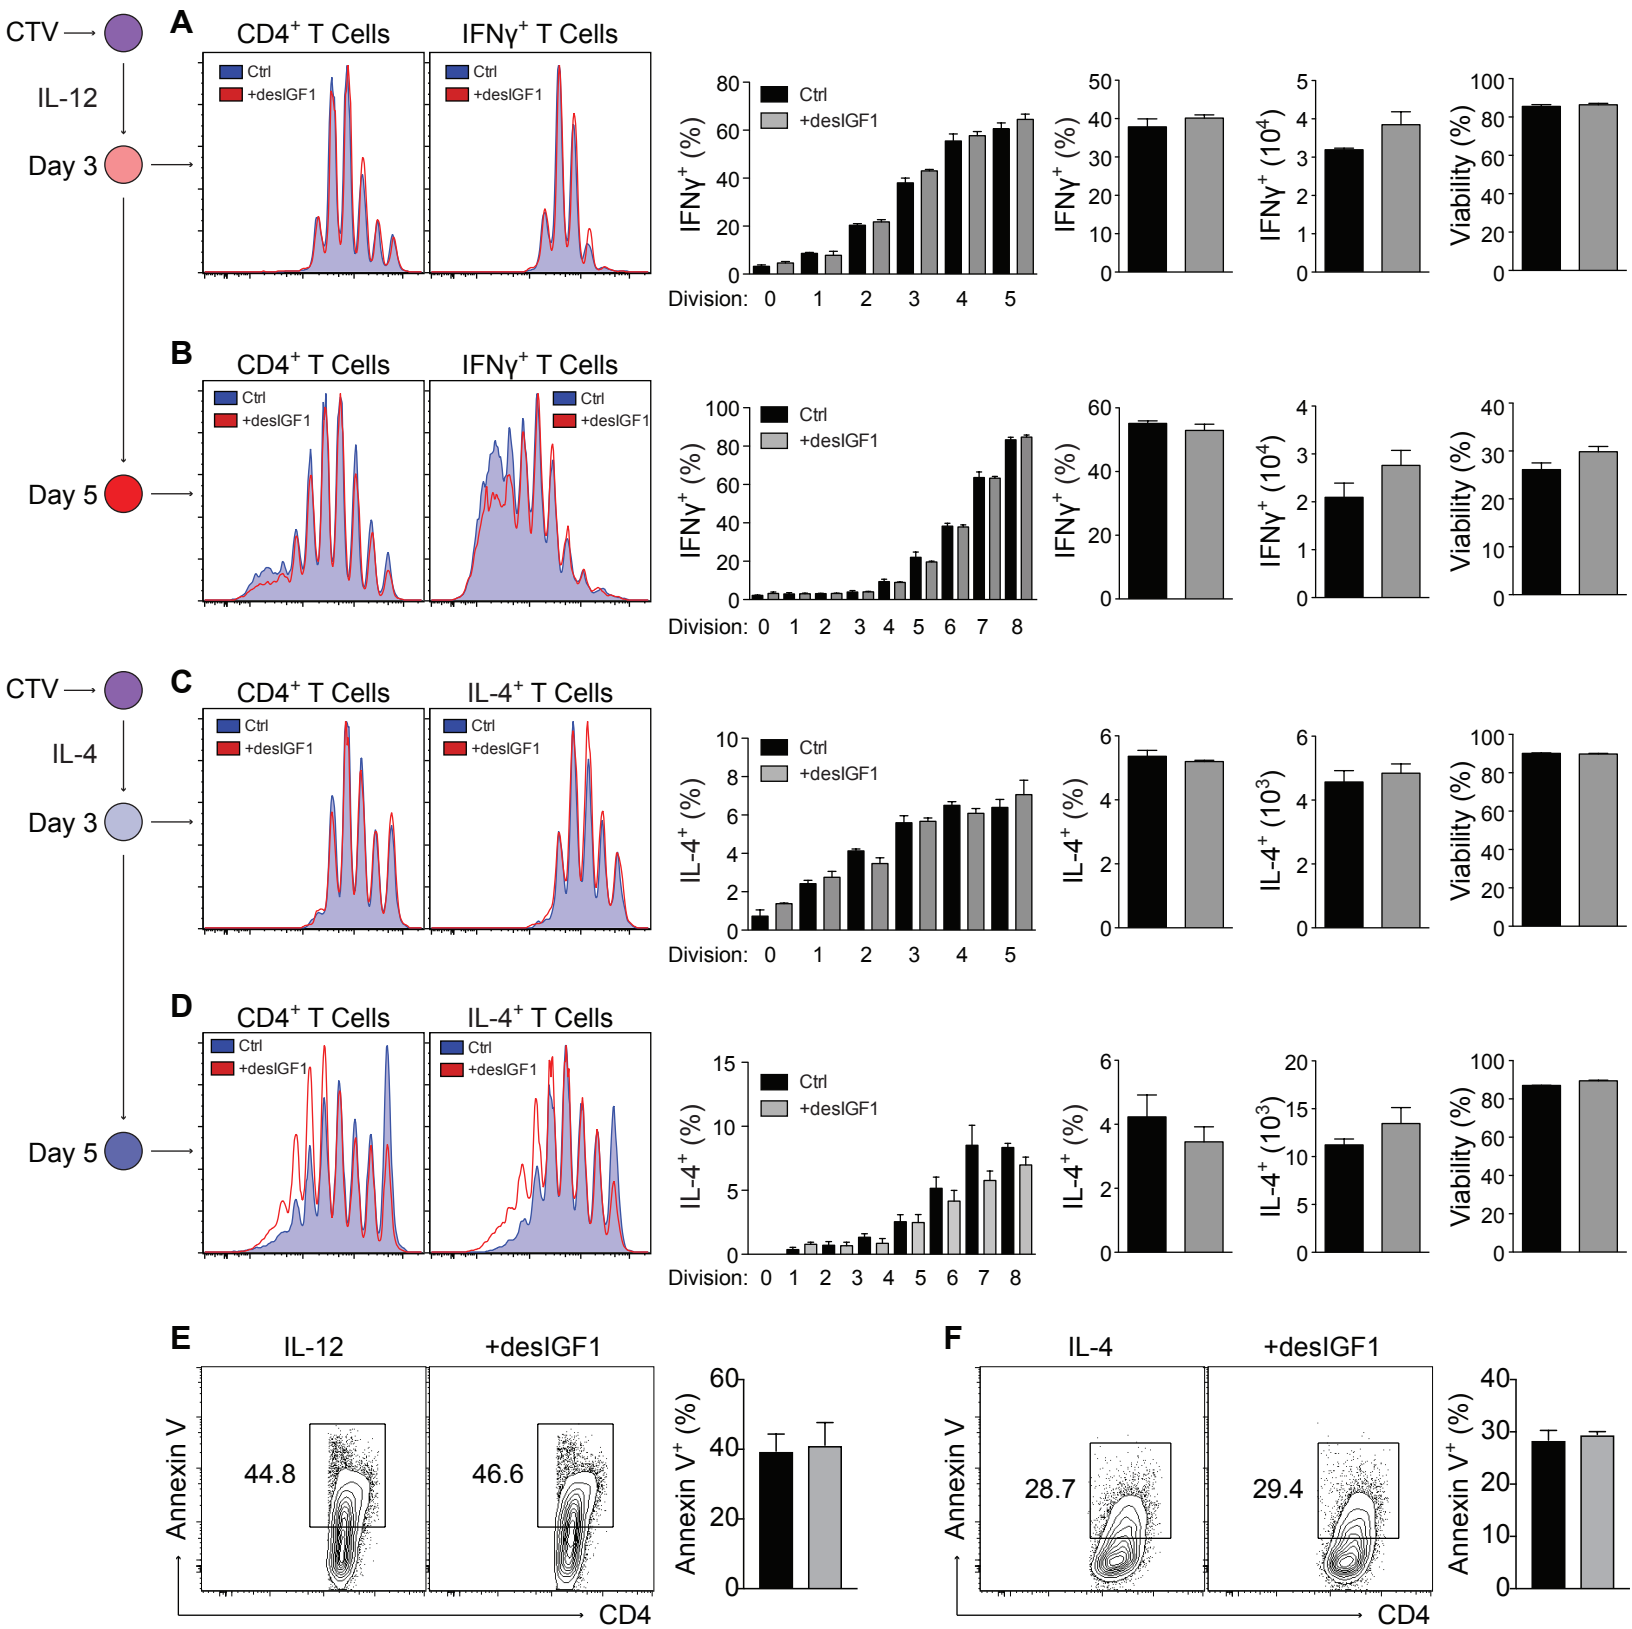

Figure S5

**Figure S5. Insulin-like growth factors do not alter proliferation or apoptosis under Th1 or Th2 conditions.**

Related to Main Figure 4.

Sorted naive CD4<sup>+</sup> T cells were labeled with CellTrace Violet and stimulated in Th1 (**A, B**) or Th2 (**C, D**) conditions with or without 20ng/mL desIGF1 for 3 (**A, C**) or 5 (**B, D**) days then assessed for expression of IFN $\gamma$  and IL-4 by flow cytometry. Flow plots are gated on total live (left) or cytokine-positive (right) cells. The left-most bar graphs indicate the percent IFN $\gamma$ <sup>+</sup> (**A, B**) or IL-4<sup>+</sup> (**C, D**) within each Cell Trace Violet peak. Bar graphs to the right indicate the percent and total number of IFN $\gamma$ <sup>+</sup> or IL-4<sup>+</sup> cells as well as the percent of cells staining negative for a dead-cell marker (far right). (**E, F**) Sorted naive CD4<sup>+</sup> T cells were stimulated in Th1 (**E**) or Th2 (**F**) conditions for 5 days. Viability and surface levels of Annexin V were assessed by flow cytometry. Flow plots are gated on total live CD4<sup>+</sup> cells and depict cell-number controlled concatenated data of three replicates from one representative experiment. All experiments were performed 2-3 times each. Data from one representative are experiment shown. Student's t-tests were used to assess significance.

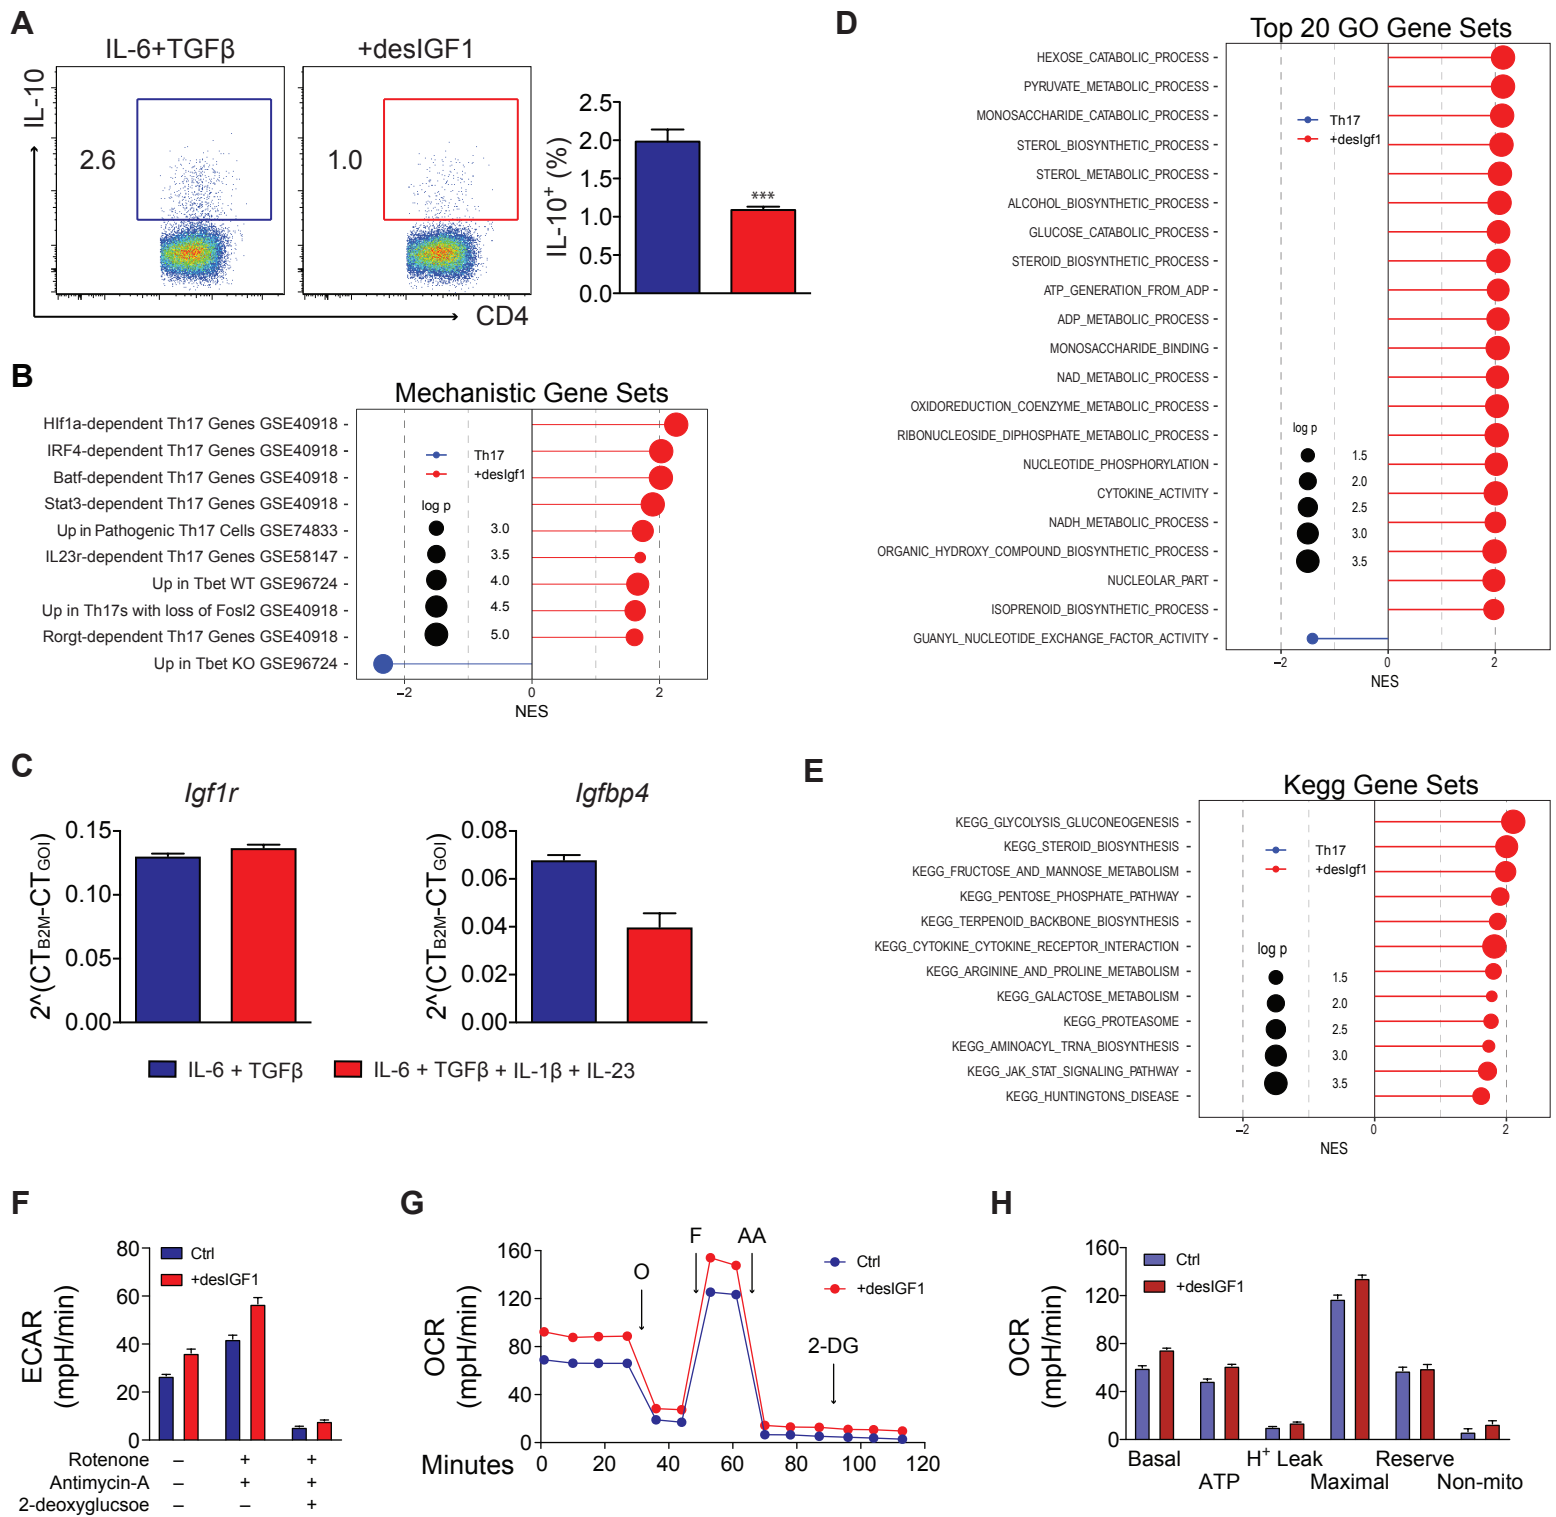

Figure S6

**Figure S6. Insulin-like growth factors alter the transcriptional, translational and metabolic identity of Th17 cells.**

Related to Main Figure 6.

(A) Sorted naïve CD4<sup>+</sup> T cells were stimulated in Th17 conditions with (red) and without (blue) desIGF1 for 5 days. Expression of IL-10 was assessed by flow cytometric intracellular staining. Data from one of five similar experiments shown. (B) Gene Set Enrichment Analysis (GSEA) was performed on RNA-seq data shown in Figure 7 using gene sets generated from publicly available transcriptomic datasets describing CD4<sup>+</sup> T cells lacking the indicated genes. (C) qPCR for *Igf1R* and *Igfbp4* was performed on RNA isolated from sorted naïve CD4<sup>+</sup> T cells stimulated in the indicated conditions for 5 days. (D+E) Pathway analysis was performed using all publicly available Gene Ontology gene sets (D) and Kyoto Encyclopedia of Genes and Genomes (E). A positive Normalized Enrichment Score (NES) indicates the gene set is enriched in desIGF1-treated cells (red), while a negative score indicates enrichment in control cells (blue). Adjusted p-values are indicated by diameter (see key, and extended methods for details). (F) Quantification of glycolysis rate assay shown in Figure 6F. (G) Oxygen consumption rate (OCR) trace of mitochondrial stress test (MST) performed on in-vitro generated Th17 cells cultured with (red) and without (blue) desIGF1. Measurements were performed prior to (basal) and following sequential addition of oligomycin (O; 1 µg/ml), FCCP (F; 1 µM), antimycin-A (AA; 10 µM) and 2-deoxyglucose (2-DG; 50 mM). (H) Quantification of glycolysis rate assay shown in Figure 6F.
